# Supplementary material for: Homoleptic uranium(iii) imidodiphosphinochalcogenides including the first structurally characterised molecular trivalent actinide–Se bond
Source: Royal Society of Chemistry journal article supplement (doi:10.1039/b503106k), 2005-01-01
Supplement: b503106k-(a).pdf [file b503106k-%28a%29.pdf]

## Supplementary data

Variable temperature  $^{31}\text{P}$  NMR (121.49 MHz) of **1** and **2** were recorded in  $\text{thf-d}_8$ , and referenced externally against 85 %  $\text{H}_3\text{PO}_4$ . Data were acquired, without sample spinning, over the temperature range 10 to  $-50$  °C in 10 degree increments.

| Temperature (°C) | Chemical Shift of Compound 1 (ppm) | Linewidth of resonance at half-height (Hz) | Chemical Shift of Compound 2 (ppm) | Linewidth of resonance at half-height (Hz) |
|------------------|------------------------------------|--------------------------------------------|------------------------------------|--------------------------------------------|
| 10               | -735.0                             | 283                                        | -774.8                             | 367                                        |
| 0                | -769.8                             | 234                                        | -810.0                             | 323                                        |
| -10              | -806.5                             | 272                                        | -849.8                             | 321                                        |
| -20              | -847.9                             | 346                                        | -889.6                             | 406                                        |
| -30              | -889.9                             | 461                                        | -935.6                             | 476                                        |
| -40              | -931.6                             | 414                                        | -978.9                             | 495                                        |
| -50              | -982.3                             | 528                                        | -1026.5                            | 536                                        |

For both **1** and **2** the resonance moves to higher field at lower temperature and the magnitude of the paramagnetically induced shift is increased upon lowering the temperature (*i.e.* between 10 and 0 °C there is a shift of 34.8 ppm for **1** and 35.2 ppm for **2**, whereas between  $-40$  and  $-50$  °C there is a shift of 50.7 ppm for **1** and 47.6 for **2**).

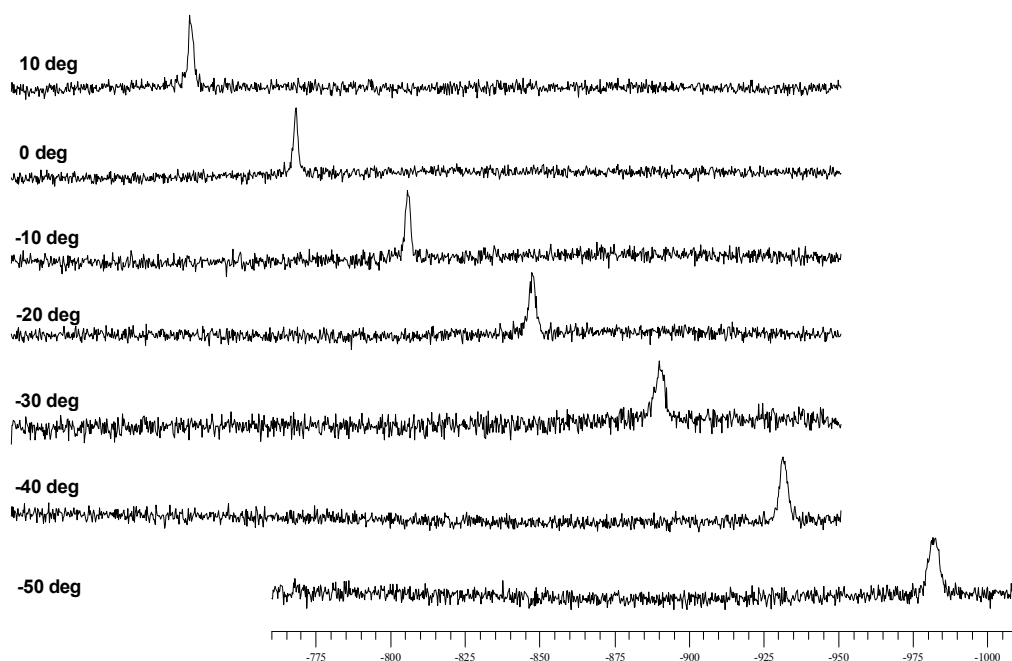

Fig.A Stacked plot of the  $^{31}\text{P}$  NMR spectra for **1** in  $\text{thf-d}_8$ , between 10 and  $-50$  °C.
