# Supplementary figures and images for: Homoleptic uranium(iii) imidodiphosphinochalcogenides including the first structurally characterised molecular trivalent actinide–Se bond
Source: Royal Society of Chemistry journal article supplement (doi:10.1039/b503106k), 2005-01-01

## Supplementary data

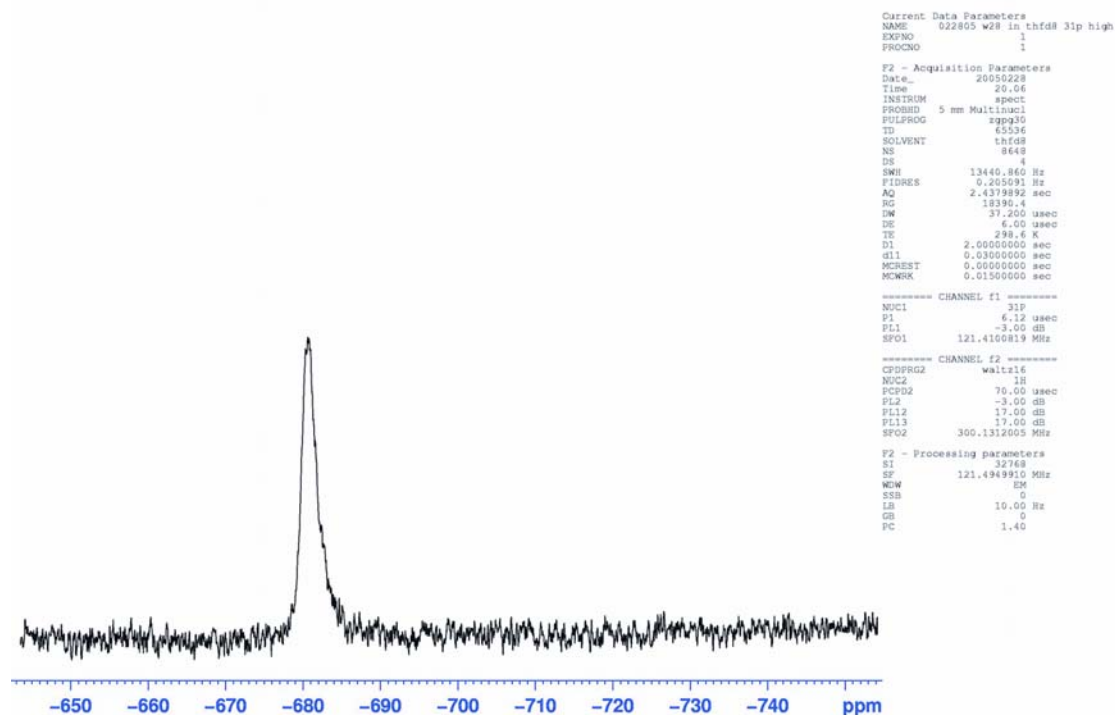

31P NMR spectrum of **1**

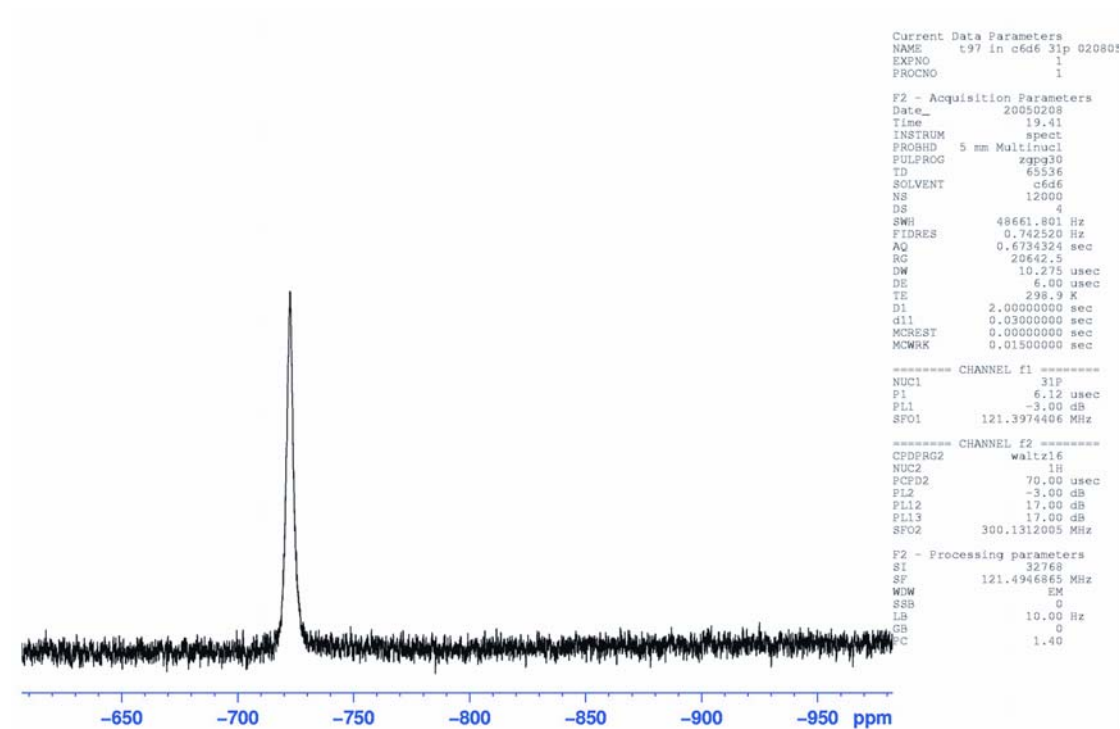

31P NMR spectrum of **2**

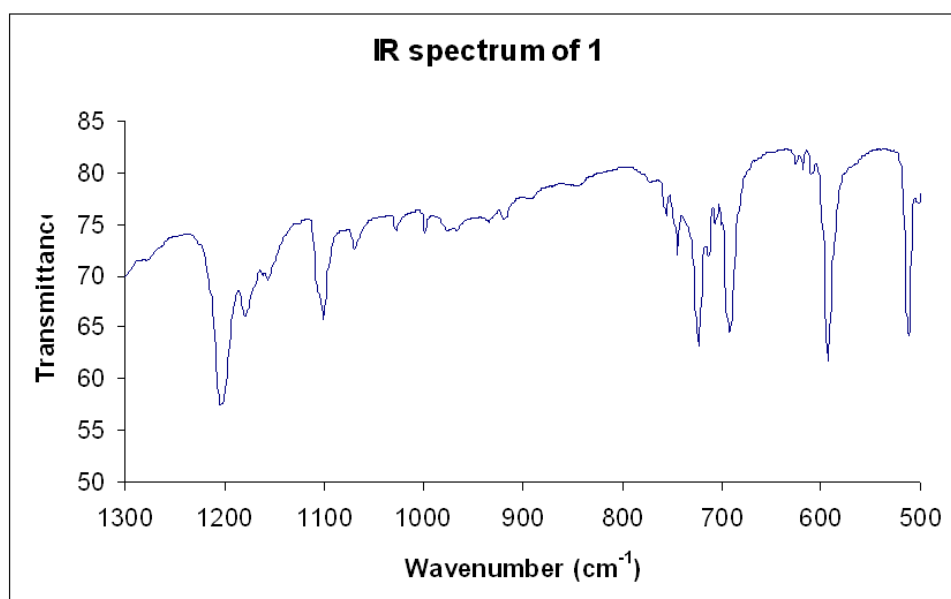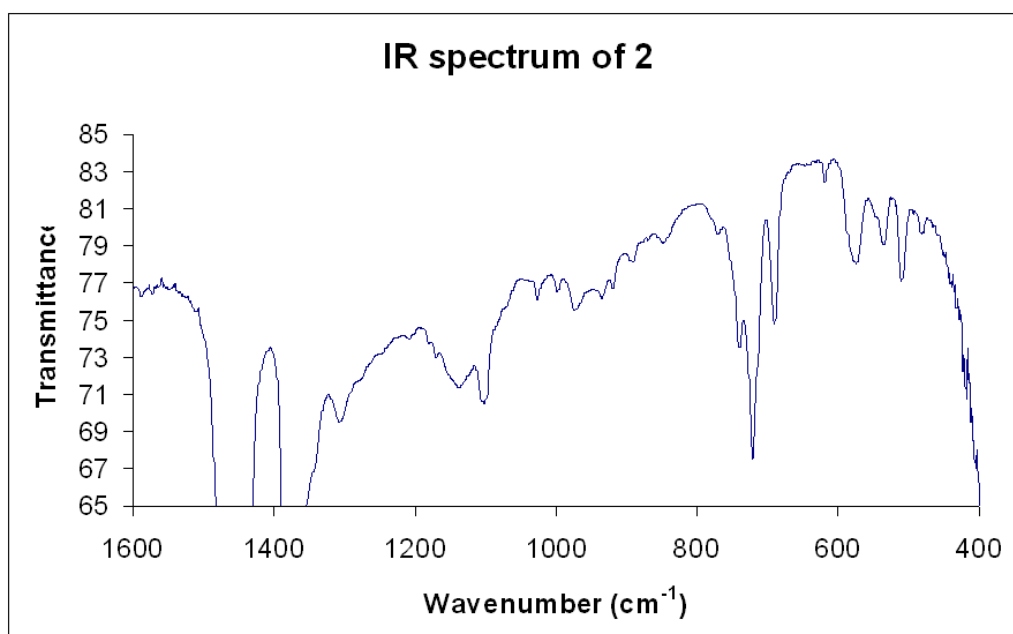

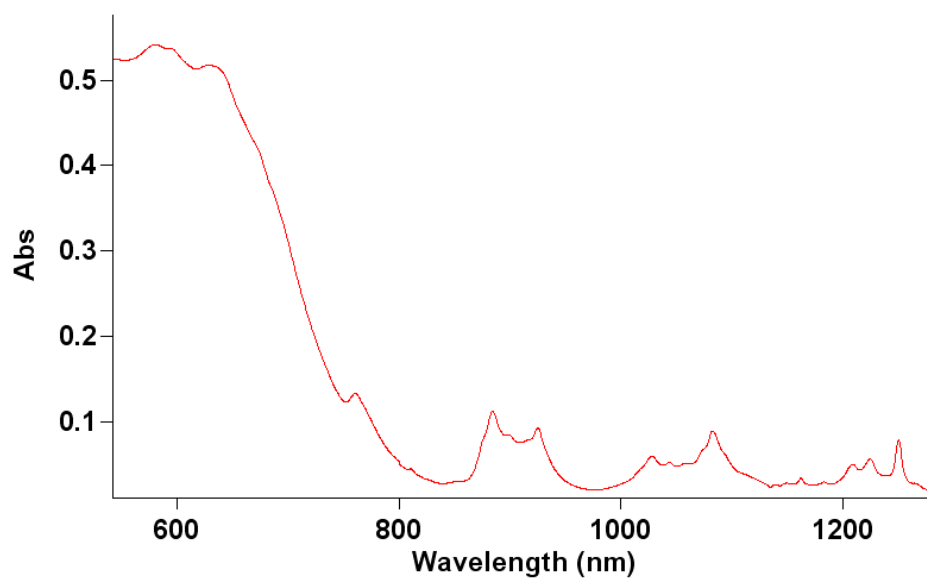

UVvis spectrum of **1**

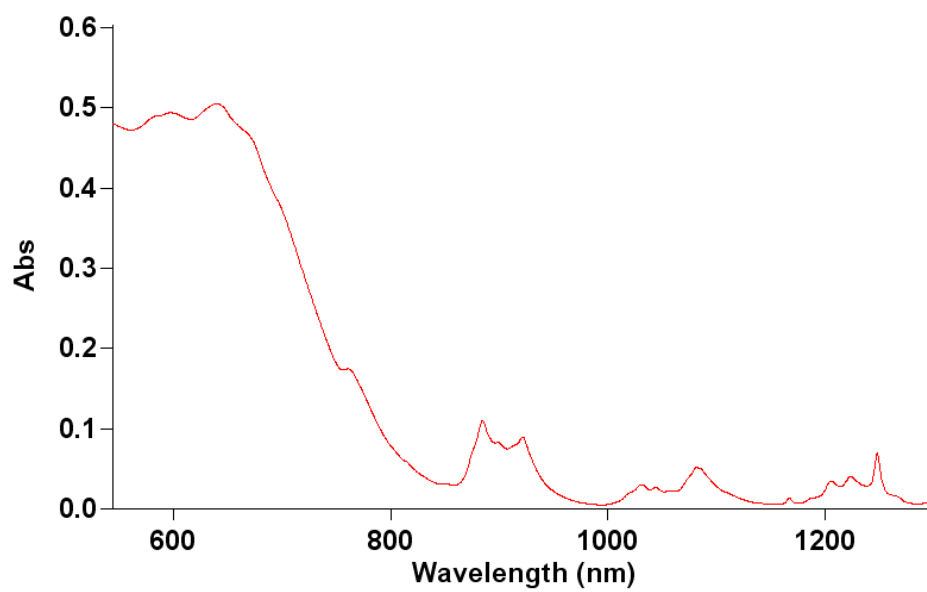

UVvis spectrum of **2**

Supplement: b503106k-(b).pdf [file b503106k-%28b%29.pdf]
